# Supplementary material for: Itzï (version 16.8): An open-source, distributed GIS model for dynamic flood simulation
Source: Copernicus journal article supplement (doi:10.5194/gmd-2016-283), 2016-12-15
Supplement: Supplementary file [file gmd-2016-283-AC2-supplement.pdf]

# Itzi (version 16.817.1): An open-source, distributed GIS model for dynamic flood simulation

Laurent Guillaume Courty<sup>1, 2</sup>, Adrián Pedrozo-Acuña<sup>1</sup>, and Paul David Bates<sup>3</sup>

<sup>1</sup>Instituto de Ingeniería, Universidad Nacional Autónoma de México, Ciudad de México, 04510 México

<sup>2</sup>Programa de Maestría y Doctorado en Ingeniería, Universidad Nacional Autónoma de México, Ciudad de México 04510 México

<sup>3</sup>School of Geographical Sciences, University of Bristol, University Road, Bristol BS8 1SS, UK

*Correspondence to:* Laurent G. Courty (lcourty@iingen.unam.mx)

**Abstract.** Worldwide, floods are acknowledged as one of the most destructive hazards. In human-dominated environments, their negative impacts are ascribed not only to the increase in frequency and intensity of floods but also to a strong feedback between the hydrological cycle and anthropogenic development. In order to advance a more comprehensive understanding of this complex interaction, this paper presents the development of a new open-source tool named *Itzi* that enables the 2D numerical modelling of rainfall-runoff processes and surface flows integrated with the open-source Geographic Information System (GIS) software known as GRASS. Therefore, it takes advantage of the ability given by GIS environments to handle datasets with variations in both temporal and spatial resolutions. Furthermore, the presented numerical tool can handle datasets from different sources with varied spatial resolutions, facilitating the preparation and management of input and forcing data. This ability reduces the pre-processing time usually required by other models. *Itzi* uses a simplified form of the Shallow Water Equations, the damped partial inertia equation, for the resolution of surface flows, and the Green-Ampt model for the infiltration. The source code is now publicly available online, along with complete documentation. The numerical model is verified against three different tests cases: firstly, a comparison with an analytic solution of the Shallow Water Equations is introduced; secondly, a hypothetical flooding event in an urban area is implemented, where results are compared to those from an established model using a similar approach; and lastly, the reproduction of a real inundation event that occurred in the city of Kingston upon Hull, U.K., in June 2007, is presented. The numerical approach proved its ability at reproducing the analytic and synthetic test cases. Moreover, simulation results of the real flood event showed its suitability at identifying areas affected by flooding, which were verified against those recorded after the event by local authorities.

## 1 Introduction

Worldwide, several records point towards an increase in the number of reported flood disaster events, which in due course have raised the magnitude of economic losses associated to their occurrence. For example, only in the last decade, 870 million people were directly affected by floods (59 000 deaths), with associated economic losses up to 340 billion US Dollars (IFRC, 2015). At the same time, the world is becoming increasingly urbanised, with more than 50 percent of the global population

already living in urban areas (Zevenbergen et al., 2010). This represents an aggravation of already existing stresses, which in combination with projected climate-induced changes will increase the expected impacts of flooding.

Indeed, population growth in urban areas is one trend that has been reported in connection with floods, which has led to more people living in potentially hazardous areas. Unless there are means to reduce the overcrowding of urban spaces located in flood prone areas, people affected, observed damages and economic losses are set to rise further. The observed global trend of population growth in the 21st century, in particular in low to middle income developing countries, opens the door to poorly planned urbanisation making their population even more vulnerable to floods (United Nations, 2014). This situation endangers the future sustainability of urban ~~environments~~environment, especially in flood prone regions of the world. It requires adaptation strategies for urban development and drainage infrastructure to a standard that may be greater than the design level originally defined in the construction of current settlements.

Due to the observed and expected flood impacts in urban areas, it is highly necessary to develop the numerical tools for this environments that can represent the involved physical processes at an adequate level of complexity. This is the reason why urban flood modelling has recently received an increased level of attention (e.g. Hsu et al., 2000; Mark et al., 2004; Schmitt et al., 2004; Sampson et al., 2012; Yu and Coulthard, 2015). One of the key requirements for an adequate urban flood modelling is the ability to handle large datasets at a high spatial resolution (Yu and Lane, 2006; Fewtrell et al., 2011). This involves the ability of a model to avoid both numerical instabilities resulting from the complexity of urban areas and extremely high computational times (Chang et al., 2015).

It is acknowledged that the natural candidate to simulate bidimensional surface flows in urban areas is through the numerical solution of the set of non-linear shallow water equations (NLSWE) (Hunter et al., 2008). However, it has also been pointed out that the application of these equations in urban cases is hampered by the high computational cost resulting from a much needed high spatial resolution and large, whole city scale domains (Neal et al., 2012b). In the last 15 years, and as an alternative to overcome this limitation, numerical approximations based on a diffusive wave scheme have become increasingly popular (e.g., Bates and De Roo, 2000; Bradbrook et al., 2004; Chen et al., 2005; Yu and Lane, 2006; Leandro et al., 2014; Guidolin et al., 2016). These studies have reported that for large domains and coarse resolution, the diffusive wave scheme is computationally more efficient than the complete solution of the NLSWE; however, it has also been noted that at higher resolutions the numerical schemes for the diffusive systems become less efficient than those resolving the NLSWE (Hunter et al., 2008). Indeed, in practice this characteristic prevents the application of diffusive wave models to urban cases.

In recognition of this limitation, ~~Bates et al. (2010) presented an~~ Bates et al. (2010) presented a flood inundation model based on a partial inertia numerical scheme. In this solution, water flows are estimated by solving the inertial momentum equation using a single explicit finite difference formulation. This modification enabled longer stable time-steps and smaller computational times through the reduction of numerical operations in comparison to those required by the solution of the NLSWE (Neal et al., 2012a). However, this solution reported numerical instabilities when friction in the floodplain was defined with ~~low~~ values of the Manning's roughness coefficient lower than  $0.03 \text{ s.m}^{-1/3}$ , which is ~~an intrinsic characteristic of a value~~ commonly found in impervious urban areas (Chow, 1959).

More recently, in order to improve the numerical stability of the local inertia solution, ~~De Almeida et al. (2012)~~ [De Almeida et al. \(2012\)](#) two modifications of the partial inertia momentum equation. Firstly, they introduced the use of information from both neighbouring cell interfaces to form a one-dimensional three point stencil; and secondly, they resolved the friction term in two dimensions, making use of a five point stencil to overcome the limitations of the staggered grid data model. These two modifications have been showed to have a better numerical stability than the original local inertia scheme (De Almeida and Bates, 2013).

Despite these advances, to the best of the author's knowledge, there is no open source model based on this approximation that integrates seamlessly with a GIS software. It should be noted that CAESAR-LISFLOOD (Coulthard et al., 2013) is an open-source numerical tool, which applies a similar approach but using the partial inertia scheme described by ~~Bates et al. (2010)~~ [Bates et al. \(2010\)](#). Meanwhile, the presented implementation uses the damped partial inertia form of the equation described by De Almeida et al. (2012) and De Almeida and Bates (2013) and allows a straight forward integration within a GIS environment.

Hence, this investigation presents an open-source implementation of the latest advances of the damped partial inertia approximation, under the GPL license. The numerical model called *Itzi* is written in Python and its aim is to simulate surface flows induced by intense rainfall in urban settings (Courty and Pedrozo-Acuña, 2016a, b). The model is tightly integrated with the open-source Geographical Information System known as GRASS (Neteler et al., 2012), which allows the easy use of space-time varying raster datasets both as inputs and outputs. Moreover, it enables the automatic integration of geographic datasets from sources that have different spatial resolutions (e.g. elevation, land use, soil types), to adequately describe floodplain topographies.

The model verification will be carried out through the comparison of numerical results against three different test cases. Firstly, results will be compared against two analytical solutions of the Non-linear Shallow Water Equations. Secondly, to ensure that the model is able to adequately predict inundation flows, a reproduction of a widely accepted standard benchmark test case (no. 8a), published in a report from the UK Environment Agency (Néelz and Pender, 2013) will be implemented. In this case, numerical results will be compared against those obtained from a well established model based on the same equations (Bates et al., 2013). Finally, in order to test the ability of *Itzi* to reproduce a real flood event, the 2007 flood registered in the City of Kingston upon Hull, UK, will be presented. Affected areas identified by the numerical tool will be compared against those surveyed by local authorities.

This paper is organised as follows: Sect. 2 introduces the numerical scheme used for the solution of the partial inertia shallow water equations; Sect. 2.6 describes the numerical implementation in an open-source GIS platform, while numerical results for the test cases are illustrated in Sect. 3.

## 2 Numerical scheme

The developed program uses an explicit finite-difference scheme to ~~sole~~ [solve](#) the simplified partial inertia shallow-water equations described by De Almeida et al. (2012) and De Almeida and Bates (2013). Figure 1 illustrates the variables used by

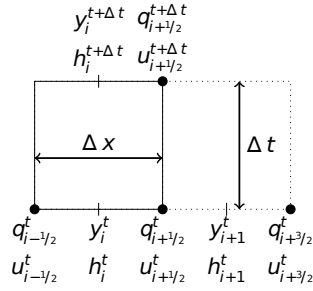

**Figure 1.** Grid and variables used in the numerical scheme. Time is shown in the vertical axis. Variables at the bottom are used at time  $t$  to calculate variables at the top at time  $t + \Delta t$ .

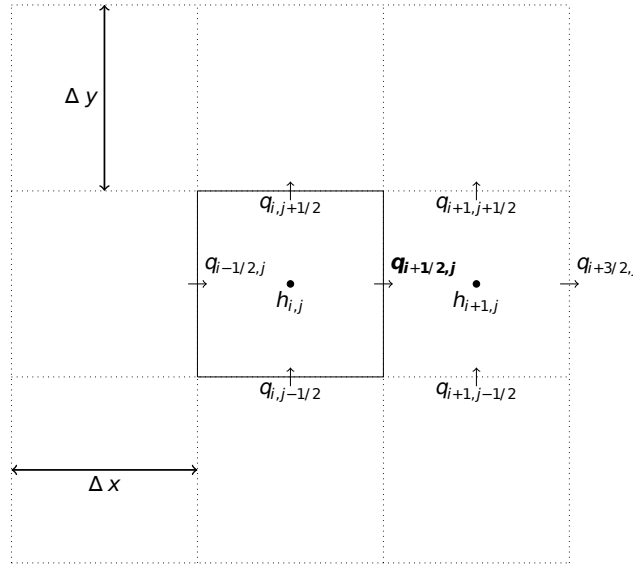

**Figure 2.** A 2D view of the staggered grid used by the numerical scheme. The variable in bold will be calculated at  $t + \Delta t$  using all the displayed variables values at time  $t$ .

the scheme in the  $x$  dimension and their variations in time. On the other hand Fig. 2 introduces a complete 2D view of the same staggered grid and variables utilised in the numerical scheme. As shown in Fig. 1, water surface elevation  $y$  and water depth  $h$  are evaluated in the centre of cells, while the water flow  $q$  (or velocity  $u$ ) variables are evaluated at the cell interfaces.

The mass flux (e.g. water flow) is obtained by solving the 1-D simplified momentum equation at interfaces between cells using the value of  $q$  at these interfaces (rather than in the centre of cells). To provide a bidimensional representation of the flow, momentum itself is updated at the cell interfaces with an explicit discretization of the momentum equation in each direction

5 separately. The numerical method is simple and extremely efficient from a computational point of view. For simplicity, in this



section we will present only the flow equation for the  $x$  dimension. The exact same principle applies for water flows in the other direction, which is represented by the  $y$  dimension.

## 2.1 Adaptive time-step

In a similar vein to previous developments, an adaptive time stepping method is used to estimate the suitable model time step based on the standard Courant–Friedrichs–Lewy (CFL) condition. The time-step  $\Delta t$  is calculated at each time-step by means of equation Eq. (1).

$$\Delta t = \alpha \frac{\min\{\Delta x, \Delta y\}}{\sqrt{g \times h_{max}}} \quad (1)$$

Where  $h_{max}$  is the maximum water depth within the domain,  $g$  the acceleration due to the gravity and  $\alpha$  an adjustment factor because the CFL condition is necessary but not sufficient to ensure stability. ~~Following the proposed value by De Almeida et al. (2012),~~  
 15 ~~De Almeida et al. (2012) propose a value of~~  $\alpha = 0.7$  ~~as a default value, as this has been used in an appropriate manner to~~  
~~simulate shown to allow the appropriate simulation of~~ subcritical flooding conditions. When  $h_{max}$  tends to 0,  $\Delta t$  is set to a user-defined time-step  $\Delta t_{max}$ , which represents the maximum value for  $\Delta t$ . Here the default for this value has been set to 5 seconds. It could be adjusted by the user to optimize computation time while preserving numerical stability.

## 2.2 Flow calculation

20 The flow at each cell interface is calculated with Eq. (2).

$$q_{i+1/2}^{t+\Delta t} = \frac{\left( \theta q_{i+1/2}^t + (1 - \theta) \frac{q_{i-1/2}^t + q_{i+3/2}^t}{2} \right) + g h_f \Delta t S}{1 + g \Delta t n^2 ||q_{i+1/2}^t|| / h_f^{7/3}} \quad (2)$$

where subscripts  $i$  and  $t$  denotes space and time indices (Cf. Fig. 1).

The flow depth  $h_f$  is the difference between the highest water surface elevation  $y$  and the highest terrain elevation  $z$ . It is calculated at the cell face using Eq. (3). This value is used as an approximation of the hydraulic radius.

25  $\theta$  is a coefficient defining the importance taken by the average of upstream and downstream flows over the flow at the considered cell face ( $q_{i+1/2}^t$ ). De Almeida et al. (2012) proposes to set this weighting factor to 0.9. If  $\theta$  is set to 1, neighbouring flows are not taken into account, being equivalent to the formula proposed by Bates et al. (2010). In some rare cases, especially when  $\theta$  is low, the flow term could end up with a different sign to the slope term. When this happens, the weighting scheme is dropped and the numerator of the equation becomes equal to the formulation presented by Bates et al. (2010).

The slope  $S$  is calculated using Eq. (4). ~~Flow~~ The flow being calculated at cell interfaces, Manning's  $n$  is obtained by  
 5 averaging the neighbouring values, as shown in Eq. (5).

$$h_{f,i+1/2}^t = \max\{y_i^t, y_{i+1}^t\} - \max\{z_i^t, z_{i+1}^t\} \quad (3)$$

$$S = \frac{y_i^t - y_{i+1}^t}{\Delta x} \quad (4)$$

$$n_{i+1/2}^t = \frac{(n_i^t + n_{i+1}^t)}{2} \quad (5)$$

The vector norm  $\|q_{i+1/2}^t\|$  is calculated using Eq. (6) given by De Almeida and Bates (2013).

$$10 \quad \|q_{i+1/2}^t\| = \sqrt{\left(q_{y,i+1/2,j}^t\right)^2 + \left(q_{x,i+1/2,j}^t\right)^2} \quad (6)$$

Inconveniently, due to the use of a staggered grid,  $q_{y,i+1/2,j}^t$  is not being calculated by the model. To overcome this, the value of the neighbouring cells are used instead as shown in Eq. (7). The positions of the given points are showed on Fig. 2.

$$q_{y,i+1/2,j}^t = \frac{q_{i,j-1/2} + q_{i,j+1/2} + q_{i+1,j-1/2} + q_{i+1,j+1/2}}{4} \quad (7)$$

### 2.3 Water depth calculation

- 15 The new water depth at each cell is calculated using Eq. (8). It consists of the sum of the current depth  $h^t$ , the external source terms (rainfall, user-defined flow etc.)  $h_{ext}^t$  and the flows passing through the four faces of each cell. If the new calculated water depth is negative, the is set to zero and the additional volume is accounted for.

$$h^{t+\Delta t} = h^t + h_{ext}^t + \frac{\sum^4 Q_{i,j}^t}{\Delta x \Delta y} \times \Delta t \quad (8)$$

### 2.4 Rain routing

- 20 In order to maintain stability during events with direct rainfall, a rain routing mechanism is implemented using a simple method described by Sampson et al. (2013). It ~~consist~~consists of applying a constant velocity to the flow when water depth is below a user-given threshold. Before the simulation begins, the software calculates the draining direction of each cell of the domain. The drainage direction is determined by the highest slope out of the four neighbouring cells. During the simulation, the routing scheme is applied at each cell interface when each of the following conditions are true:

- $h_f < h_{fmin}$ ,
- the considered direction is allowed for routing according to the routing map,
- 5 – the slope  $S$  is in the same direction as the above routing direction.

The routing flow is then calculated using a constant user-given velocity. According to Sampson et al. (2013), a depth threshold of 5mm and a routing velocity of  $0.1\text{m.s}^{-1}$  gives good results.

## 2.5 Infiltration

In *Itzi*, the infiltration could be represented by a map or a time-series of maps containing a fixed-value for the infiltration rate in  $\text{mm.h}^{-1}$ . Alternatively, the Green-Ampt method can be used, as shown in Eq. (9), where  $f$  is the infiltration rate ( $\text{L.T}^{-1}$ ),  $K$  the hydraulic conductivity ( $\text{L.T}^{-1}$ ),  $\theta_e$  the effective porosity in ( $\text{L.L}^{-1}$ ),  $\theta$  the initial water soil content ( $\text{L.L}^{-1}$ ),  $\psi_f$  the wetting front capillary pressure head ( $\text{L}$ ) and  $F$  the infiltration amount ( $\text{L}$ ).

$$f = K \left( 1 + \frac{(\theta_e - \theta)\psi_f}{F} \right) \quad (9)$$

## 2.6 ~~Integration~~ Implementation in Python

The software is written in the Python programming language ~~, is operated by a command line interface~~ and integrates tightly with the open-source GIS GRASS (Neteler et al., 2012). It employs the libraries *PyGRASS* (Zambelli et al., 2013) to access the geographical functions and *TGRASS* (Gebbert and Pebesma, 2014) for the temporal management of both the input and the output data. Additionally, further optimisation of the numerical code was carried out by means of a Python profiler that records the call stack of the executing code, thus accounting for the time spent in the solution of each function within the code. This enabled the parallelisation through Cython (Behnel et al., 2011) of those functions with the highest computational cost, reducing the overall computing time by taking advantage of multi-cores CPU. The integration of this numerical model within GRASS provides *Itzi* with the following relevant characteristics:

- The spatio-temporal data management is straightforward as the integration within a GIS platform reduces the time spent on preparation of entry data and the analysis of results. Modifying the spatial extent and resolution of the simulation is done by simply changing the GRASS computational region, without the need for changing the entry data.
- Forcings could be of heterogeneous resolutions. For example elevation at 5m, rainfall at 1km, friction coefficient at 30m etc. *Itzi* will automatically read the data at the resolution defined by the computational region and uses the data seamlessly, without user intervention.
- Input data can vary in space and time (i.e. raster time-series); permitting the use of, for example, spatially distributed rainfall or time-varying friction coefficients.
- The ability to use absolute time references in form of date and time for start and end of the simulation, facilitating the usage of historical rainfall. It is therefore possible to have several years of rainfall data stored in the GIS and to simulate just one specific event, without further data pre-processing.

*Itzi* is operated by a command line interface taking a parameters file as an input. If several input files are given, they are run in batch mode. The user can ask the software to output the following raster time-series:

- Water depth ( $h$ ) and surface elevation ( $h + z$ ).

- flow velocity magnitude and direction,
- volumetric flows in  $x$  and  $y$  directions,
- 10 – average volume added or subtracted to the domain by the action of infiltration, rainfall, user-defined inflow, drainage capacity or the application of boundary conditions,
- volume created due to numerical instability (Cf. section 2.3).

Additionally, the software can produce a CSV file that summarizes the statistics mentioned above.

### 3 Verification and evaluation

#### 15 3.1 Analytic test cases

For the analytic test cases, we utilise numerical experiments aimed at testing subcritical flow simulations recently published in a compilation of shallow water analytic solutions for hydraulic and environmental studies (Delestre et al., 2013). Both cases described here are constituted by a 1km long channel of MacDonald’s type (MacDonald et al., 1997), discretized at 5m resolution. These test cases were generated with the free software SWASHES available at <https://sourcesup.renater.fr/projects/swashes/>.

The first case corresponds to a constant upstream flow of  $2\text{m}^2.\text{s}^{-1}$ , while the second one combines an upstream flow of  $1\text{m}^2.\text{s}^{-1}$  and a uniform rainfall with an intensity of  $0.001\text{m}.\text{s}^{-1}$ . In the model, the input flow is given as a mass addition. This creates an artificially high water level at the most upstream cell, where the input flow is added. Given that the goal of the analytic tests is to verify the validity of the numerical scheme, we determine the Root Mean Squared Error (RMSE) omitting the very first cell of the domain. Figures 3 and 4 illustrate the performance of *Itzi* at reproducing results from the analytic solution, reporting RMSE of ~~0.003~~ 0.002 and 0.03 metres, for each case respectively. Those RMSE values are one to two orders of magnitudes lower than the vertical accuracy of airborne LiDAR (Hodgson and Bresnahan, 2004), demonstrating the suitability of the implemented simplified scheme to simulate subcritical flow conditions.

#### 3.2 Direct rainfall and sewer overflow in an urban setting

30 In order to further test the numerical model, previously published benchmark test cases for 2D flood inundation modelling tools by the UK Environment Agency (Néelz and Pender, 2013), were implemented. These cases correspond to a benchmarking exercise assessing the latest generation of 2D hydraulic modelling tools for a variety of purposes in Flood and Coastal Risk Management (FCRM) to support Environment Agency decision making. This dataset is available online at [http://evidence.environment-agency.gov.uk/FCERM/Libraries/FCERM\\_Project\\_Documents/stefan\\_zipfile.sflb.ashx](http://evidence.environment-agency.gov.uk/FCERM/Libraries/FCERM_Project_Documents/stefan_zipfile.sflb.ashx).

5 In particular, one hypothetical test case was utilised to verify the proper implementation of the numerical scheme to simulate physical processes controlling flood movement across a floodplain. The test case (test case number 8a in the Environment Agency study) corresponds to a synthetic event which does not relate to any real event (Néelz and Pender, 2013). The modelled

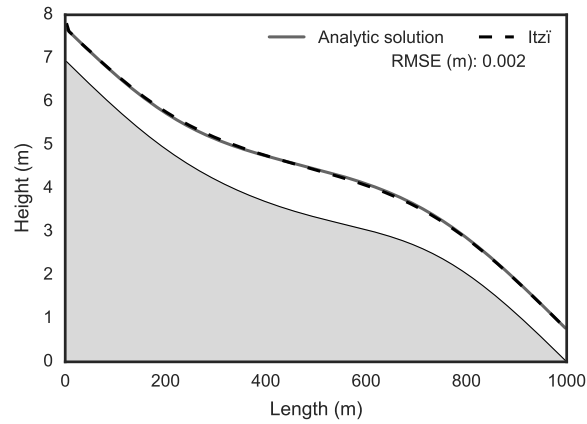

**Figure 3.** One-dimensional Comparing *Itzi* with an analytic solution. Case of the one-dimensional MacDonald long-channel.

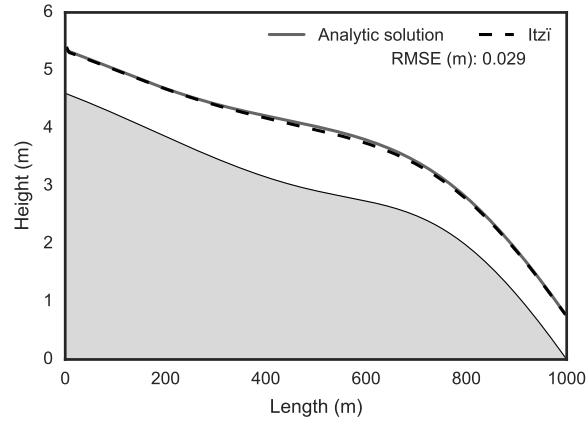

**Figure 4.** One-dimensional Comparing *Itzi* with an analytic solution. Case of the one-dimensional MacDonald long-channel with rain.

area is in the City of Glasgow, UK (Cockenzie Street and surrounding streets) and is approximately 400 by 960 metres. Ground elevations span a range of 21m to 37m. While the flood is assumed to arise from two sources: a uniformly distributed rainfall (applied only to the modelled area) and a point inflow representing a sewer outflow from a surcharging culvert. For completeness, Fig. 5 shows both forcings described by the hyetograph and the hydrograph specified at the point inflow. The

5 Digital Elevation Model (DEM) has a spatial resolution of 0.5m, which is resampled to 2m resolution for modelling purposes. This represents the terrain model with no vegetation or buildings and was created from a LiDAR dataset provided by the UK Environment Agency. The roughness coefficient was determined following the classification of the area with two land-cover

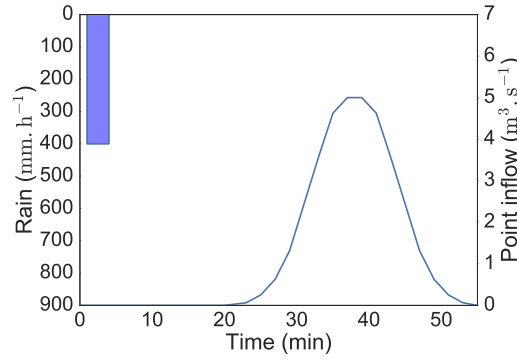

**Figure 5.** Rectangular hyetograph and point inflow hydrograph for the EA test 8a.

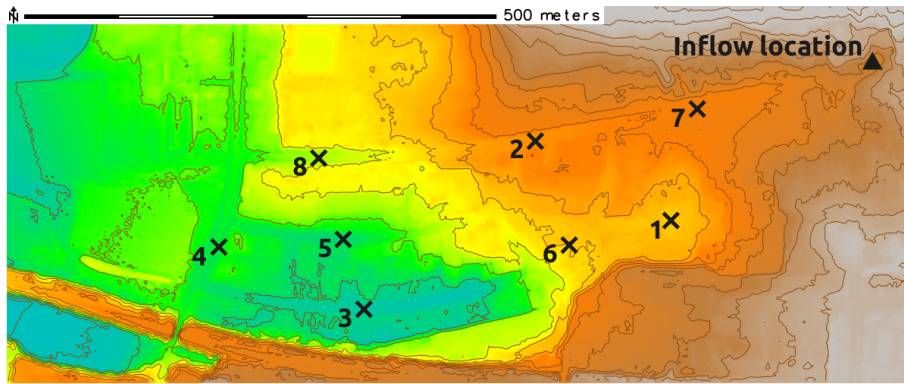

**Figure 6.** DEM of EA test 8a with showing the numbered control points (crosses) and inflow point (triangle).

roughnesses: roads and pavements ( $n = 0.02$ ), and everywhere else ( $n = 0.05$ ). The model was run until time  $t = 83$  min as this was considered enough to allow the flood to pond in the lower parts of the modelled domain.

- 10 Numerical results obtained with *Itzi* have been compared to those obtained with the implementation of the *acceleration* solver from LISFLOOD-FP (De Almeida et al., 2012; De Almeida and Bates, 2013). This is done as the latter is considered the reference implementation of the numerical scheme here employed. For this comparison eight different locations within the numerical domain were selected to compare water depths estimated by both numerical tools. Figure 6 illustrates the utilised digital elevation model, along with the position of the inflow point (blue triangle) and selected control points for the comparison of model results (red crosses).

The simulation is run for 83 minutes with both LISFLOOD-FP and *Itzi* using the same parameters, shown in Table 1. Figure 7 illustrates the time series of water level produced by both numerical models and at the eight selected locations. Moreover, for clarity differences between each model result are also shown in all panels, where the blue solid line represents the numerical, as well as the time series of differences between the results of the LISFLOOD-FP, while the green dashed line illustrates results from *Itzi* two models. It is shown that in all eight selected locations, numerical results from both models are similar with

**Table 1.** Simulation parameters for the EA test case 8a

| Parameter        | Value                |
|------------------|----------------------|
| $\Delta t_{max}$ | 5s                   |
| $\alpha$         | 0.7                  |
| $\theta$         | 0.7                  |
| $v_r$            | $0.1\text{m.s}^{-1}$ |
| $h_{fmin}$       | 0.005m               |

$v_r$ : routing velocity

5 small differences identified at the arrival time of the flood wave in each location. These differences are ascribed to the way that LISLFLOOD-FP handles entry data in comparison to *Itzi*. In the first case, a temporal interpolation is performed during the simulation at each time-step, while in the second case, this process should be carried out during the preparation of input space-time raster datasets. The ~~comparison of numerical results from both models,~~ RMSE at the eight location range from 0.2 to 10.6 mm (Cf. Fig. 7). This indicates that the numerical solution of the partial inertia approximation implemented in *Itzi* ;  
10 generates results with the same level of skill as the reference model.

### 3.3 Real flood event: Kingston upon Hull, UK

In order to evaluate the ability of the presented tool to reproduce a real-life flood, we use an event that occurred on the 25th of June 2007 in the city of Kingston upon Hull, UK. Widespread flooding was registered due to an extreme precipitation event (hp=110mm) that lasted for more than 12 hours. The estimated 24 hour rainfall was estimated between a 1/150 and 1/200 year  
5 return period (Coulthard and Frostick, 2010; Hanna et al., 2008). As reported by ~~Yu and Coulthard (2015)~~ Yu and Coulthard (2015), the major forcing of this event, was surface water runoff both locally in the urban area and through the rural lands surrounding the city.

Figure 8 introduces the location of the study area within the ~~United Kingdom~~ Great Britain. Fig. 9 presents the utilised DEM that was obtained for the area by means of a LiDAR system and has a spatial resolution of 5 metres. The study area measures  
10  $87.7\text{km}^2$  and the numerical domain is comprised of ~~3.5million-~~ million cells. It can be seen that most of the city is located in a low-lying region, with some parts that are at or even below sea-level.

The numerical forcing condition was defined with measured rainfall recorded by a pluviometer located at ~~Hull University~~ the University of Hull, with the assumption that rainfall was uniform over the whole numerical domain. Figure 10 introduces the recorded hyetograph, which has a temporal resolution of one hour. The whole event lasts for 24 hours. ~~Due to-~~  
15 Multiple observation data sets for this flood event were obtained from the UK Environment Agency and Hull City Council. They have been collected by aerial photography and by carrying out a poll among the residents, respectively (Coulthard and Frostick, 2010). Water depths in some local places were reported to be up to 3m, but for most affected areas the depth was observed as being less than 1m (Coulthard and Frostick, 2010). Flood extent maps were produced by each of these authorities and are

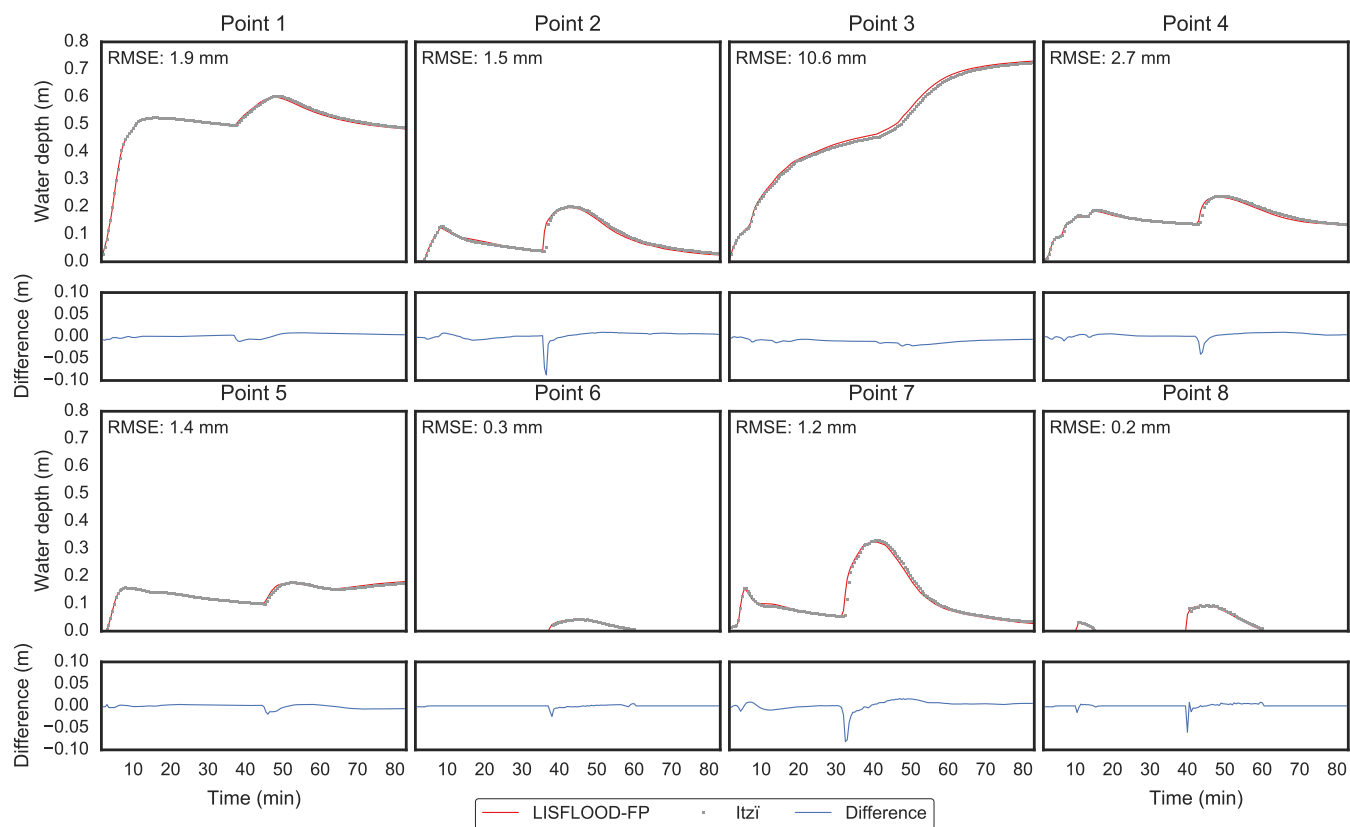

**Figure 7.** Comparison of water depths at control points. The blue line represents the differences of water depth between *Itzi* and *LISFLOOD-FP*.

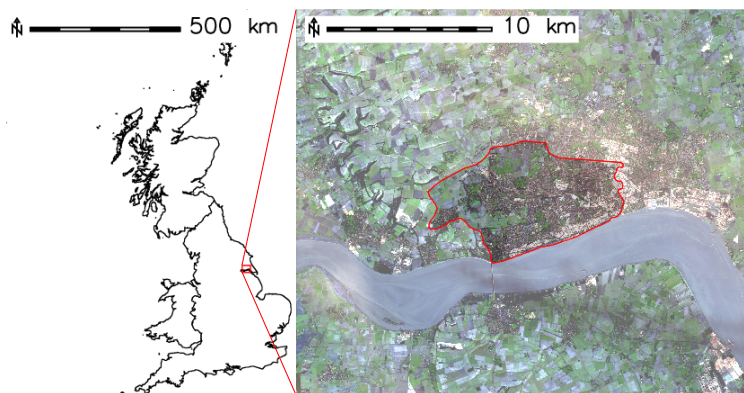

**Figure 8.** Location of the Hull study area (satellite imagery Copernicus Sentinel 2016)



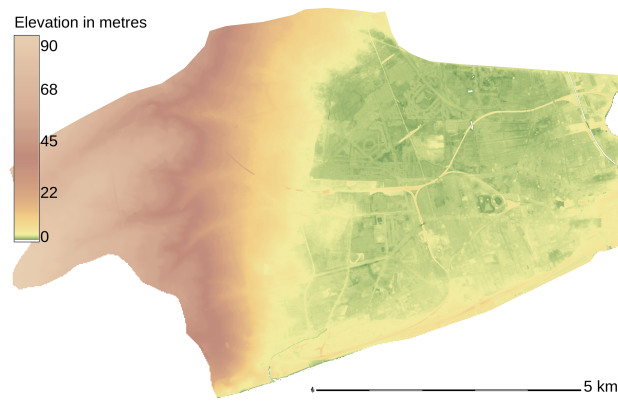

**Figure 9.** Digital elevation model of Hull

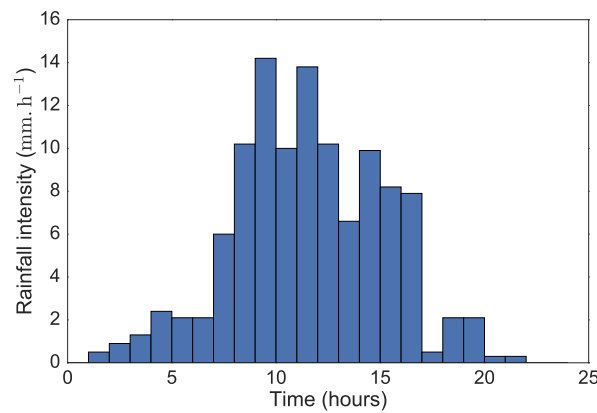

**Figure 10.** Hyetograph at the University of Hull

shown in Fig. 11. It could be noted that the two zones classified by the two administrations show significant differences highlighted in Table 2. Notably, less than half of each of the observation could be validated by the other one. Furthermore, due to the lack of information related to the drainage system within the city, the capacity of the urban drainage to store water was simulated following the work presented by Yu and Coulthard (2015), where this system is represented through a numerical loss which is considered constant in time and uniform in space. The specified value for this loss was uniformly set to 55mm/day. limitations of the data collection methods, it is highly possible that some actually affected areas might not be identified (Coulthard and Frostick, 2010).

- 10 Reliable results of flood routing and inundation simulation rely on an accurate estimation of the resistance coefficient. The hydraulic resistance of open-channel and overland flow results are typically represented through the Manning's friction coefficient. It is acknowledged that the level of detail at which this process can be represented is dependent on the scale of the simulation. Usually, when modelling water flows in river flood plains, this drag may be conceptually divided into several zones,

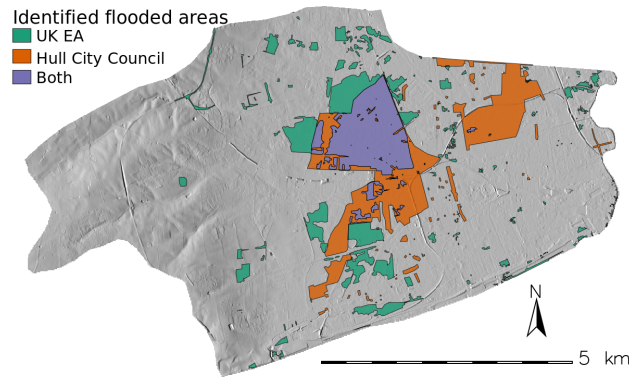

**Figure 11.** Hyetograph at Observed flood extent in Hull university. Green: UK Environment Agency. Orange: Hull City Council. Purple: Both EA and City Council.

**Table 2.** Comparison of identified flood extents.

| <u>Collecting entity</u>        | <u>Area (km<sup>2</sup>)</u> |
|---------------------------------|------------------------------|
| <u>Environment Agency</u>       | <u>5.16</u>                  |
| <u>City Council</u>             | <u>6.18</u>                  |
| <u>Both City Council and EA</u> | <u>2.33</u>                  |

namely, main channel, soil grain roughness and vegetative roughness (e.g., Pedrozo-Acuña et al., 2012). Therefore it is important to represent the spatial variability of this parameter. In this sense, the ability of *Itzi* to employ entry data with heterogeneous resolutions is handy. To illustrate this, two numerical experiments are presented, firstly one that considers a uniform Manning's n value of 0.03 for the whole numerical domain, following the work presented by Yu and Coulthard (2015). Secondly, a spatially variable roughness map is defined in terms of the Manning's n value within the domain. For this, data from the global land cover product (with resolution of 30m - GLC30) provided by National Geomatics Center of China (Chen et al., 2014) is employed to classify land uses and to relate them. Figure 12 shows the repartition of those land cover classes in the study area. The land cover classes are then related to Manning's n values following published values by Chow (1959). The resulting friction map from this process, at a spacial resolution of 30m, is shown in Fig. ???. In this figure,  $0.019 \text{ s.m}^{-1/3}$  represents urban areas, while  $0.04 \text{ s.m}^{-1/3}$  cultivated lands,  $0.05 \text{ s.m}^{-1/3}$  forests and  $0.04$  using values proposed by Chow (1959), as shown in Table 3.

According to Yu and Coulthard (2015), the drainage capacity in the urban and rural areas could be estimated to 70 and 15 mm per day, respectively. Therefore, a drainage capacity map has been generated using the land cover map (Cf. Fig. 12), where the artificial surfaces have been assigned a constant value of  $2.917 \text{ mm.h}^{-1}$  and the remaining areas  $0.625 \text{ mm.h}^{-1}$ .

It should be noted that although In this presented case, the ability of *Itzi* to employ entry data with heterogeneous resolutions is advantageous. Although the simulation is run at 5m, the friction map is kept at all the maps are kept at their native resolutions,

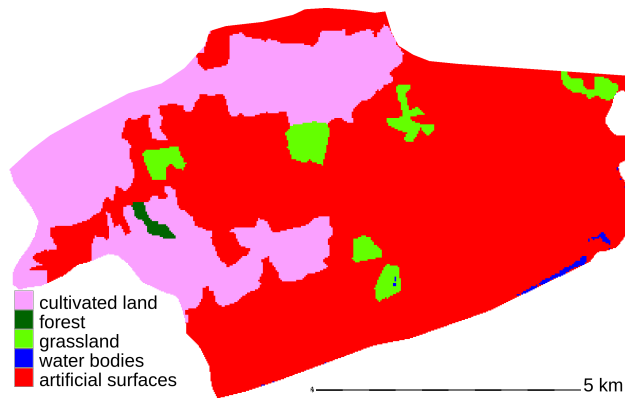

**Figure 12.** Map of the land cover classes in Hull from GLC30 (Chen et al., 2014).

**Table 3.** Relation between land cover classes and Manning's n in Hull.

| Land cover class | Manning's n ( $s.m^{-1/3}$ <del>grasslands</del> ) |
|------------------|----------------------------------------------------|
| Urban area       | 0.019                                              |
| Cultivated land  | 0.04                                               |
| Forest           | 0.05                                               |
| Grassland        | 0.03                                               |

which are 5m for the DEM and 30m ~~for rasters deducted from land cover.~~ The integration of the numerical tool within the GRASS GIS environment ~~provides Itzi with all the maps at the selected modelling resolution.~~ This process does not require ~~the need of~~ any pre-processing of the data by the user, which is seen as an advantage of Itzi over other numerical tools. This ability saves time during the preparation of entry data for modelling purposes.

~~Manning's n values ( $s.m^{-1/3}$ )~~  
~~Multiple observation data sets for this flood event were obtained from the UK Environment Agency and Hull City Council.~~  
~~Water depths in some local places were reported to be up to 3 m, but for most affected areas the depth was as being less than 1 m. Flood extent maps were produced by each of these authorities and are shown in Fig. 11, with clear differences between the identified affected areas being noticeable.~~

~~Flood extent in Hull. Red: UK Environment Agency. Blue: Hull City Council (satellite imagery Copernicus Sentinel 2016)~~  
 Figure 13 shows five snapshots of the development of inundation in the floodplain (panels ~~a-da to e~~), along with the maximum depth attained during the whole simulation time (panel f) during the simulation ~~with uniform friction~~. Indeed, the result shown in panel f of this figure can be used for comparison against the identified flooded areas reported in Fig. 11.

Since in this case, the map of the measured flood extent is dichotomous, i.e. the area is either inundated or not, numerical results will be evaluated in this way too. To achieve this, a wet/dry condition was employed and defined through a threshold

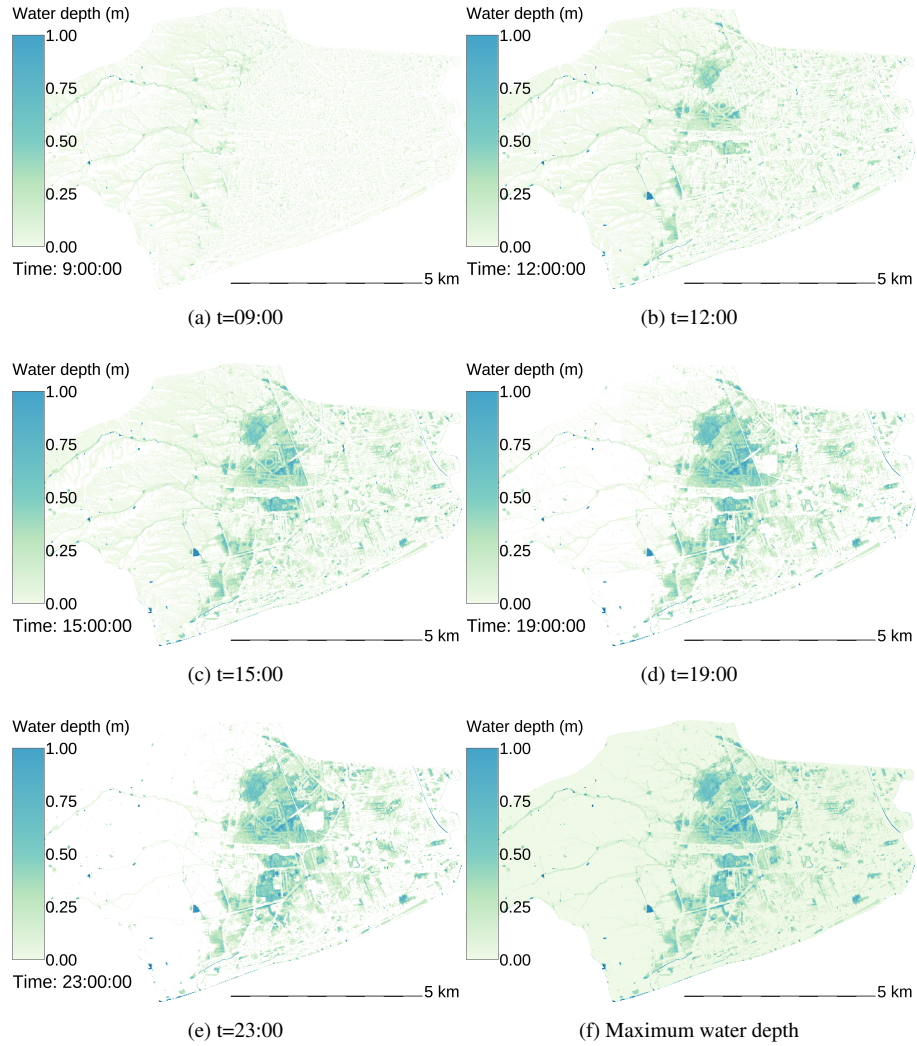

**Figure 13.** Water depth in Hull. Panels a to e: Evolution of water depth in Hull when using a uniform friction (m). Panel f: Maximum water depth (m).

water depth over which the numerical cell is considered flooded. Here, the maximum computed water depth has been compared with the union of the flooded areas presented in Fig. 11 using different water depth thresholds. Common dichotomous skill scores (Stanski et al., 1989) has been used for this task. A succinct description of those scores is provided in Table 4. Among them, the Critical Success Index is commonly used by the community of hydraulic modelling as an indication of the fit (Sampson et al., 2015).

- 5 Tables ?? and ??-5 shows the different scores used to compare the computed area and the measured one for each friction case. As mentioned by Yu and Coulthard (2015), this event is not sensible to friction, explaining the similar results in both the

**Table 4.** ~~Verification~~ Short description of the ~~flood prediction skill scores~~ used in ~~Hull using uniform friction~~ this paper (Stanski et al., 1989; Brooks et al.).

|  | <u>Name</u>                    | <u>Description</u>                                                                                                                  | <u>Perfect score</u> |
|--|--------------------------------|-------------------------------------------------------------------------------------------------------------------------------------|----------------------|
|  |                                |                                                                                                                                     |                      |
|  | Equitable threat score         | Adequation between the observed flooded area and the simulated flooded areas, taking into account the number of hits due to chance. | 1.0                  |
|  | Heidke skill score             | Informs about the accuracy of the model compared to random chance.                                                                  | 1.0                  |
|  | Probability of detection       | Fraction of flooded areas that were correctly modelled.                                                                             | 1.0                  |
|  | Bias score                     | Informs how the frequency of computed flooded areas compares to the frequency of observed flooded areas.                            | 1.0                  |
|  | Success ratio                  | Fraction of the modelled flooded areas that where actually observed.                                                                | 1.0                  |
|  | Odds ratio skill score         | Indicates how much the model improves the prediction over random prediction.                                                        | 1.0                  |
|  | Probability of false detection | Fraction of the observed non-flooded area that was modelled as inundated.                                                           | 0.0                  |
|  | Critical success index         | Indicates how well the computed flooded areas correspond to the observed inundated areas.                                           | 1.0                  |
|  | False alarm ratio              | Fraction of the computed flooded area that actually did not inundate.                                                               | 0.0                  |
|  | Accuracy                       | Fraction of the computed flooded and non-flooded areas that where correctly predicted.                                              | 1.0                  |

~~uniform and variable Manning's n~~. It could be noted that when the depth threshold is increasing (and therefore the computed flooded area decreases), the Probability of False Detection (PFD), Probability of Detection (POD), Bias Score and False Alarm Ratio (FAR) are decreasing; meanwhile the Accuracy and Success ratio are increasing. This could be explained by the predominance of correct negative area that increases together with the threshold. The scores that take into account this bias like Equitable Threat Score, Heidke Skill Score and Critical Success Index are higher when the threshold depth is 20cm.

5 The reproduction of this real flood event, with the considered assumptions, demonstrate the the suitability of *Itz'* to simulate urban inundations. However, it is acknowledged that for this case there are several sources of uncertainty that may prevent a better skill in the numerical results, ~~these~~. These are:

**Table 5.** Verification of the flood prediction in Hull~~using variable friction.~~

|                                |                                | Threshold depth (m) |                                |                                |                                |
|--------------------------------|--------------------------------|---------------------|--------------------------------|--------------------------------|--------------------------------|
|                                | <u>Score</u>                   | 0.05                | 0.10                           | 0.20                           | 0.30                           |
| Equitable threat score         | <del>0.2100</del> <u>0.209</u> |                     | 0.242                          | <del>0.2680</del> <u>0.277</u> | <del>0.2320</del> <u>0.258</u> |
| Heidke skill score             | <del>0.3470</del> <u>0.346</u> |                     | <del>0.3890</del> <u>0.390</u> | <del>0.4230</del> <u>0.434</u> | <del>0.3770</del> <u>0.410</u> |
| Probability of detection       | <del>0.7140</del> <u>0.722</u> |                     | <del>0.6450</del> <u>0.655</u> | <del>0.5180</del> <u>0.539</u> | <del>0.3740</del> <u>0.414</u> |
| Bias score                     | <del>1.9261</del> <u>1.958</u> |                     | <del>1.5241</del> <u>1.557</u> | <del>1.0001</del> <u>1.038</u> | <del>0.6390</del> <u>0.690</u> |
| Success ratio                  | <del>0.3710</del> <u>0.369</u> |                     | <del>0.4230</del> <u>0.420</u> | <del>0.5180</del> <u>0.520</u> | <del>0.5860</del> <u>0.599</u> |
| Odds ratio skill score         | <del>0.7770</del> <u>0.780</u> |                     | <del>0.7930</del> <u>0.795</u> | <del>0.8220</del> <u>0.830</u> | <del>0.8320</del> <u>0.849</u> |
| Probability of false detection | <del>0.2380</del> <u>0.243</u> |                     | <del>0.1730</del> <u>0.178</u> | <del>0.0950</del> <u>0.098</u> | <del>0.0520</del> <u>0.054</u> |
| Critical success index         | 0.323                          |                     | <del>0.3430</del> <u>0.344</u> | <del>0.3490</del> <u>0.360</u> | <del>0.2960</del> <u>0.324</u> |
| False alarm ratio              | <del>0.6290</del> <u>0.631</u> |                     | <del>0.5770</del> <u>0.580</u> | <del>0.4820</del> <u>0.480</u> | <del>0.4140</del> <u>0.401</u> |
| Accuracy                       | <del>0.7540</del> <u>0.751</u> |                     | <del>0.7970</del> <u>0.795</u> | <del>0.8410</del> <u>0.842</u> | <del>0.8540</del> <u>0.858</u> |

- Uncertainty in the ~~measured~~observed flood extent maps, as shown by differences in the areas identified by the UK Environment Agency and the Hull City Council (Cf. Fig. 11),
  - A simplistic representation of the drainage system,
  - The utilisation of uniform rainfall in the numerical domain,
  - The lack of consideration for the infiltration processes,
  - An inadequate consideration of some terrain features, like walls and buildings, that might not be well represented in a 5m DEM.
- 5    Lastly, we can evaluate the software performance of *Itzi* for this test case in term of computational cost and numerical stability. The results of this analysis is presented in Table 6. It shows that the run time is about 3 hours using an Intel® Core™ i7-4790 processor. Apart from using a faster computer with more cores, possible paths to improve running times include further optimisation of the code, making use of CPU vector extensions (like AVX and similar) and reprogramming the computationally intensive parts of the software to run on Graphical Processing Units (GPU). Additionally, it could be seen in Table 6 that the
- 10 volume created due to computational instability (Cf. Section 2.3) represents only 0.03% of the water volume in the domain at the end of the simulation, denoting a rather stable numerical scheme.

#### 4 Conclusions

This paper presented *Itzi*, a new dynamic hydrologic and hydraulic model made for simulation of surface flows in two dimensions. The numerical tool is written in Python and uses a partial inertia numerical scheme coupled with a simple rainfall routing

**Table 6.** Evaluation of software performance of *Itzi* in the test case of Hull.  $V_{error}$  is the total volume created due to numerical instability during the simulation.  $V_{final}$  is the total volume in the domain at the end of the simulation.

| <u>Variables</u>                        | <u>Values</u>    |
|-----------------------------------------|------------------|
| <u>Computational time</u>               | <u>03:06</u>     |
| <u><math>V_{error} (m^3)</math></u>     | <u>1 030</u>     |
| <u><math>V_{final} (m^3)</math></u>     | <u>4 027 749</u> |
| <u><math>V_{error}/V_{final}</math></u> | <u>0.03%</u>     |

15 system. Notably, the tool is tightly coupled with the open-source GIS GRASS, which allows easy management of input and output data of heterogeneous resolution and the use of data varying in space and time in the form of raster time-series, like precipitation or friction coefficients.

The validity of the numerical scheme has been ~~proven~~demonstrated by two analytic benchmarks, resulting in RMSEs one to two orders of magnitude lower than airborne LiDAR vertical accuracy (Hodgson and Bresnahan, 2004). The implementation  
20 has also been compared to a reference implementation of the same numerical scheme (LISFLOOD-FP) for the test case number 8a of the UK Environment Agency two-dimensional hydraulic model benchmark ~~tests~~-(Néelz and Pender, 2013). On that test simulating a urban flood from direct rainfall and sewer overflow, *Itzi* gives results nearly equal to LISFLOOD-FP. The presented model has ~~been then then been~~ evaluated with the numerical reproduction of a flood event that occurred in June 2007 in the city of Hull, UK and showed *Itzi*'s ability to identify the main flooded areas.

Future works will focus on 1) applying the advantages of the GIS integrated model by using global ~~dataset~~datasets for flood  
5 modelling, and 2) coupling this overland flow model with a drainage network model. The latter will enhance *Itzi*'s capability of performing more complete hydrologic and hydraulic simulations in urban environment.

## 5 Code Availability

The source code of *Itzi* is freely available under the GNU GPL license (~~Courty, 2016~~)(Courty, 2017). The link to the online repository and a user manual ~~is~~are accessible on the project website (<http://www.itzi.org>).

10 *Acknowledgements.* We warmly acknowledge Dapeng Yu from Loughborough University, UK, for kindly providing the DEM, map of flooded areas and rainfall data for the numerical reproduction of the flood event in Kingston upon Hull. Laurent Courty is grateful for the support given by a full PhD scholarship from UNAM's Coordination of Posgraduate Studies. He extends his warm thanks to Jeffrey C. Neal from the University of Bristol for casting light on the numerical scheme implementation in LISFLOOD-FP and Mark Trigg from the Univeristy of Leeds for his insights on testing the early versions of *Itzi*.

## 15 References

- Bates, P., Trigg, M., Neal, J., and Dabrowa, A.: LISFLOOD-FP User Manual, Code release 5.9.6, University of Bristol, 2013.
- Bates, P. D. and De Roo, A. P. J.: A simple raster-based model for flood inundation simulation, *Journal of hydrology*, 236, 54–77, 2000.
- Bates, P. D., Horritt, M. S., and Fewtrell, T. J.: A simple inertial formulation of the shallow water equations for efficient two-dimensional flood inundation modelling, *Journal of Hydrology*, 387, 33–45, doi:10.1016/j.jhydrol.2010.03.027, <http://dx.doi.org/10.1016/j.jhydrol.2010.03.027>, 2010.
- Behnel, S., Bradshaw, R., Citro, C., Dalcin, L., Seljebotn, D. S., and Smith, K.: Cython: The Best of Both Worlds, *Computing in Science Engineering*, 13, 31–39, doi:10.1109/MCSE.2010.118, 2011.
- Bradbrook, K., Lane, S., Waller, S., and Bates, P.: Two dimensional diffusion wave modelling of flood inundation using a simplified channel representation, *International Journal of River Basin Management*, 2, 211–223, doi:10.1080/15715124.2004.9635233, 2004.
- Brooks, H., Brown, B., Ebert, B., Ferro, C., Jolliffe, I., Koh, T.-Y., Roebber, P., and Stephenson, D.: Methods for forecast verification, <http://www.cawcr.gov.au/projects/verification>.
- Chang, T. J., Wang, C. H., and Chen, A. S.: A novel approach to model dynamic flow interactions between storm sewer system and overland surface for different land covers in urban areas, *Journal of Hydrology*, 524, doi:10.1016/j.jhydrol.2015.03.014, 2015.
- Chen, A. S., Hsu, M. H., Chen, T. S., and Chang, T. J.: An integrated inundation model for highly developed urban areas, *Water Science and Technology*, 51, 221–229, <http://www.ncbi.nlm.nih.gov/pubmed/15790247>, 2005.
- Chen, J., Chen, J., Liao, A., Cao, X., Chen, L., Chen, X., He, C., Han, G., Peng, S., Lu, M., Zhang, W., Tong, X., and Mills, J.: Global land cover mapping at 30m resolution: A POK-based operational approach, *ISPRS Journal of Photogrammetry and Remote Sensing*, 103, 7–27, doi:10.1016/j.isprsjprs.2014.09.002, <http://www.sciencedirect.com/science/article/pii/S0924271614002275>, 2014.
- Chow, V. T.: Open channel hydraulics, McGraw-Hill Book Company, Inc; New York, 1959.
- Coulthard, T. and Frostick, L.: The Hull floods of 2007: implications for the governance and management of urban drainage systems, *Journal of Flood Risk Management*, 3, 223–231, doi:10.1111/j.1753-318X.2010.01072.x, <http://doi.wiley.com/10.1111/j.1753-318X.2010.01072.x>, 2010.
- Coulthard, T. J., Neal, J. C., Bates, P. D., Ramirez, J., de Almeida, G. A. M., and Hancock, G. R.: Integrating the LISFLOOD-FP 2D hydrodynamic model with the CAESAR model: implications for modelling landscape evolution, *Earth Surface Processes and Landforms*, 38, 1897–1906, doi:10.1002/esp.3478, <http://doi.wiley.com/10.1002/esp.3478>, 2013.
- Courty, L.: Itzi version 16.8, doi:10.5281/zenodo.60026, <https://www.itzi.org>, 2016.
- Courty, L. G.: Itzi version 17.1, doi:10.5281/zenodo.376667, <https://doi.org/10.5281/zenodo.376667>, 2017.
- Courty, L. G. and Pedrozo-Acuña, A.: A GRASS GIS module for 2D superficial flow simulations, in: *Proceedings of the 12th International Conference on Hydroinformatics*, doi:10.5281/zenodo.159617, 2016a.
- Courty, L. G. and Pedrozo-Acuña, A.: Modelo numérico para la simulación dinámica de inundaciones urbanas en SIG, in: *Proceedings of XXVII Congreso Latinoamericano de Hidráulica*, doi:10.5281/zenodo.159619, 2016b.
- De Almeida, G. a. M. and Bates, P.: Applicability of the local inertial approximation of the shallow water equations to flood modeling, *Water Resources Research*, 49, 4833–4844, doi:10.1002/wrcr.20366, 2013.
- De Almeida, G. a. M., Bates, P., Freer, J. E., and Souvignet, M.: Improving the stability of a simple formulation of the shallow water equations for 2-D flood modeling, *Water Resources Research*, 48, 1–14, doi:10.1029/2011WR011570, 2012.



- 15 Delestre, O., Lucas, C., Ksinant, P.-A., Darboux, F., Laguerre, C., Vo, T.-N.-T., James, F., and Cordier, S.: SWASHES: a compilation of shallow water analytic solutions for hydraulic and environmental studies, *International Journal for Numerical Methods in Fluids*, 72, 269–300, doi:10.1002/fld.3741, <https://hal.archives-ouvertes.fr/hal-00628246>, 2013.
- Fewtrell, T. J., Duncan, A., Sampson, C. C., Neal, J. C., and Bates, P. D.: Benchmarking urban flood models of varying complexity and scale using high resolution terrestrial LiDAR data, *Physics and Chemistry of the Earth, Parts A/B/C*, 36, 281–291, 2011.
- 20 Gebbert, S. and Pebesma, E.: TGRASS: A temporal GIS for field based environmental modeling, *Environmental Modelling & Software*, 53, 1–12, 2014.
- Guidolin, M., Chen, A. S., Ghimire, B., Keedwell, E. C., Djordjević, S., and Savić, D. A.: A weighted cellular automata 2D inundation model for rapid flood analysis, *Environmental Modelling & Software*, 84, 378–394, doi:10.1016/j.envsoft.2016.07.008, 2016.
- Hanna, E., Mayes, J., Beswick, M., Prior, J., and Wood, L.: An analysis of the extreme rainfall in Yorkshire, June 2007, and its rarity, *Weather*, 63, 253–260, doi:10.1002/wea.319, <http://doi.wiley.com/10.1002/wea.319>, 2008.
- 25 Hodgson, M. E. and Bresnahan, P.: Accuracy of Airborne Lidar-Derived Elevation, *Photogrammetric Engineering & Remote Sensing*, pp. 331–339, doi:10.14358/PERS.70.3.331, 2004.
- Hsu, M.-H. H., Chen, S.-H. H., and Chang, T.-J. J.: Inundation simulation for urban drainage basin with storm sewer system, *Journal of Hydrology*, 234, 21–37, doi:10.1016/S0022-1694(00)00237-7, 2000.
- 30 Hunter, N. M., Bates, P. D., Neelz, S., Pender, G., Villanueva, I., Wright, N. G., Liang, D., Falconer, R. A., Lin, B., Waller, S., Crossley, A. J., and Mason, D. C.: Benchmarking 2D hydraulic models for urban flooding, *Proceedings of the ICE - Water Management*, 161, 13–30, doi:10.1680/wama.2008.161.1.13, <http://eprints.whiterose.ac.uk/77249/>, 2008.
- IFRC: World Disaster Report 2015, Tech. rep., <http://ifrc-media.org/interactive/world-disasters-report-2015/>, 2015.
- Leandro, J., Chen, A. S., and Schumann, A.: A 2D Parallel Diffusive Wave Model for floodplain inundation with variable time step (P-DWave), *Journal of Hydrology*, 2014.
- 35 MacDonald, I., Baines, M. J., Nichols, N. K., and Samuels, P. G.: Analytic Benchmark Solutions for Open-Channel Flows, *Journal of Hydraulic Engineering*, 123, 1041–1045, doi:10.1061/(ASCE)0733-9429(1997)123:11(1041), [http://ascelibrary.org/doi/abs/10.1061/\(ASCE\)0733-9429\(1997\)123:11\(1041\)](http://ascelibrary.org/doi/abs/10.1061/(ASCE)0733-9429(1997)123:11(1041)), 1997.
- Mark, O., Weesakul, S., Apirumanekul, C., Aroonnet, S. B., and Djordjevic, S.: Potential and limitations of 1D modelling of urban flooding, doi:10.1016/j.jhydrol.2004.08.014, 2004.
- Neal, J., Schumann, G., and Bates, P.: A subgrid channel model for simulating river hydraulics and floodplain inundation over large and data sparse areas, *Water Resources Research*, 48, n/a–n/a, doi:10.1029/2012WR012514, <http://doi.wiley.com/10.1029/2012WR012514>, 2012a.
- 5 Neal, J., Villanueva, I., Wright, N., Willis, T., Fewtrell, T., and Bates, P.: How much physical complexity is needed to model flood inundation?, *Hydrological Processes*, 26, 2264–2282, 2012b.
- Néelz, S. and Pender, G.: Benchmarking the latest generation of 2D Hydraulic Modelling Packages, Tech. rep., Environment Agency, 2013.
- 10 Neteler, M., Bowman, M. H., Landa, M., and Metz, M.: GRASS GIS: A multi-purpose open source GIS, *Environmental Modelling & Software*, 31, 124–130, 2012.
- Pedrozo-Acuña, A., Mariño-Tapia, I., Enriquez, C., Medellín Mayoral, G., and González Villareal, F. J.: Evaluation of inundation areas resulting from the diversion of an extreme discharge towards the sea: case study in Tabasco, Mexico, *Hydrological Processes*, 26, 687–704, doi:10.1002/hyp.8175, <http://doi.wiley.com/10.1002/hyp.8175>, 2012.

- 15 Sampson, C. C., Fewtrell, T. J., Duncan, A., Shaad, K., Horritt, M. S., and Bates, P. D.: Use of terrestrial laser scanning data to drive decimetric resolution urban inundation models, *Advances in water resources*, 41, 1–17, 2012.
- Sampson, C. C., Bates, P. D., Neal, J. C., and Horritt, M. S.: An automated routing methodology to enable direct rainfall in high resolution shallow water models, *Hydrological Processes*, 27, 467–476, doi:10.1002/hyp.9515, 2013.
- Sampson, C. C., Smith, A. M., Bates, P. D., Neal, J. C., Alfieri, L., and Freer, J. E.: A high-resolution global flood hazard model, *Water Resources Research*, 51, n/a–n/a, doi:10.1002/2015WR016954, <http://doi.wiley.com/10.1002/2015WR016954>, 2015.
- 20 Schmitt, T. G., Thomas, M., and Ettrich, N.: Analysis and modeling of flooding in urban drainage systems, *Journal of Hydrology*, 299, 300–311, doi:10.1016/j.jhydrol.2004.08.012, 2004.
- 425 Stanski, H. R., Wilson, L. J., and Burrows, W. R.: Survey of common verification methods in meteorology, World Meteorological Organization Geneva, [http://www.cawcr.gov.au/projects/verification/Stanski{}\\_et{}\\_al/Stanski{}\\_et{}\\_al.html](http://www.cawcr.gov.au/projects/verification/Stanski{}_et{}_al/Stanski{}_et{}_al.html), 1989.
- United Nations: World Urbanization Prospects, 2014.
- Yu, D. and Coulthard, T. J.: Evaluating the importance of catchment hydrological parameters for urban surface water flood modelling using a simple hydro-inundation model, *Journal of Hydrology*, 524, 385–400, doi:10.1016/j.jhydrol.2015.02.040, 2015.
- 430 Yu, D. and Lane, S. N.: Urban fluvial flood modelling using a two-dimensional diffusion-wave treatment, part 1: mesh resolution effects, *Hydrologic Processes*, 20, 1541–1565, 2006.
- Zambelli, P., Gebbert, S., and Ciolli, M.: Pygrass: An object oriented python application programming interface (API) for geographic resources analysis support system (GRASS) geographic information system (GIS), *ISPRS International Journal of Geo-Information*, 2, 201–219, 2013.
- 435 Zevenbergen, C., Cashman, A. C., Evelpidou, N., Pasche, E., Garvin, S., and Ashley, R.: Urban Flood Management, 1372, doi:10.1002/ana.22591, 2010.
